# Supplementary material for: The Effortless Assessment of Risk States (EARS) Tool: An Interpersonal Approach to Mobile Sensing
Source: PubMed Central journal article supplement (PMC6134227; doi:10.2196/10334), 2018-08-28
Supplement: mental_v5i3e10334_app1.pdf [file mental_v5i3e10334_app1.pdf]

|                                              |    |    |    |   |   |   |   |   |   |   |   |   |
|----------------------------------------------|----|----|----|---|---|---|---|---|---|---|---|---|
| Facial expressions                           | ✓  |    |    |   |   |   |   |   |   |   |   |   |
| Music choice                                 | ✓  |    |    |   |   |   |   |   |   |   |   |   |
| Barometer                                    |    | ✓  |    |   |   |   |   |   |   |   |   | ✓ |
| Wearables                                    | ✓  |    |    |   |   |   | ✓ |   |   |   |   | ✓ |
| Video diary <sup>g</sup>                     | ✓  |    |    |   |   |   |   |   |   |   |   |   |
| Audio diary <sup>g</sup>                     |    |    |    |   | ✓ |   |   |   | ✓ |   |   |   |
| Ecological momentary assessment <sup>g</sup> | ✓  | ✓  | ✓  |   | ✓ | ✓ |   | ✓ | ✓ | ✓ |   |   |
| Count                                        | 16 | 11 | 10 | 9 | 9 | 9 | 8 | 8 | 7 | 7 | 6 | 5 |

<sup>a</sup>EARS, AWARE, EmotionSense, Purple Robot, Beiwe, Funf, RADAR-CNS, and ResearchKit are open source.

<sup>b</sup>EARS: Effortless Assessment of Risk States.

<sup>c</sup>RADAR-CNS: Remote Assessment of Disease and Relapse – Central Nervous System.

<sup>d</sup>MOSS: Mobile Sensing and Support.

<sup>e</sup>Availability of the feature is limited to Android versions Kit-Kat [4.4] and below.

<sup>f</sup>SMS: short message service.

<sup>g</sup>Feature is not passive (ie, requires active engagement from the user).
